# Supplementary material for: Protein-Protein Interaction Antagonists as Novel Inhibitors of Non-Canonical Polyubiquitylation
Source: PubMed Central journal article supplement (PMC2894972; doi:10.1371/journal.pone.0011403), 2010-06-30
Supplement: pone.0011403.s002.pdf [file pone.0011403.s002.pdf]

**Table S1.** Free binding energies for CDOCK selected enantiomers of family I cyclic compounds.

| Enantiomer | VDW     | ELEC_R | ELEC_L | COULOM | APOLAR  | TOTAL   |
|------------|---------|--------|--------|--------|---------|---------|
| Ie1_1      | -40.971 | 11.599 | 3.478  | 0.146  | -6.433  | -32.180 |
| Ie1_2      | -40.983 | 11.375 | 3.004  | 0.252  | -6.218  | -32.568 |
| Ie1_3      | -40.075 | 11.133 | 3.741  | 0.25   | -6.310  | -31.260 |
| Ie1_4      | -39.099 | 11.033 | 2.931  | 0.114  | -6.242  | -31.263 |
| Ie1_5      | -39.508 | 11.304 | 2.843  | 0.239  | -6.216  | -31.336 |
| Ie1_6      | -38.667 | 10.702 | 2.717  | -0.256 | -6.242  | -31.746 |
| Ie1_7      | -38.702 | 11.811 | 2.781  | -0.050 | -6.324  | -30.483 |
| Ie1_8      | -39.623 | 10.761 | 3.686  | -0.303 | -6.266  | -31.745 |
| Ie1_9      | -37.217 | 8.590  | 3.305  | -1.144 | -5.475  | -31.940 |
| Ie1_10     | -36.797 | 9.310  | 2.541  | -0.766 | -5.827  | -31.539 |
| Ie1_11     | -38.32  | 11.859 | 2.601  | -1.229 | -6.061  | -31.150 |
| Ie1_12     | -37.097 | 11.204 | 2.748  | -0.841 | -6.269  | -30.255 |
| Ie1_13     | -33.536 | 10.944 | 3.528  | -2.692 | -5.615  | -27.370 |
| Ie1_14     | -39.153 | 10.625 | 3.344  | 0.0273 | -60.219 | -31.177 |
| Ie1_15     | -34.082 | 10.389 | 3.494  | -2.574 | -5.662  | -28.434 |
| Ie1_16     | -37.161 | 8.012  | 3.207  | -1.155 | -5.442  | -32.539 |
| Ie1_17     | -32.884 | 11.115 | 3.730  | -2.621 | -5.444  | -26.104 |
| Ie1_18     | -32.273 | 9.611  | 3.108  | -2.902 | -5.241  | -27.697 |
| Ie1_19     | -37.195 | 8.997  | 2.951  | -1.152 | -60.514 | -32.450 |
| Ie1_20     | -32.444 | 9.735  | 3.383  | -2.875 | -5.457  | -27.658 |
| Ie2_1      | -35.733 | 10.507 | 2.564  | -0.721 | -5.633  | -29.015 |
| Ie2_2      | -32.292 | 11.534 | 3.257  | -3.736 | -5.188  | -26.425 |
| Ie2_3      | -31.315 | 9.782  | 3.590  | -2.265 | -5.667  | -25.875 |
| Ie2_4      | -35.067 | 9.280  | 2.708  | -0.356 | -5.975  | -29.409 |
| Ie2_5      | -35.56  | 9.268  | 3.913  | -0.991 | -5.356  | -28.725 |
| Ie2_6      | -29.528 | 7.788  | 3.298  | -3.028 | -5.483  | -26.954 |
| Ie2_7      | -29.447 | 8.242  | 3.131  | -3.092 | -5.382  | -26.548 |
| Ie2_8      | -29.419 | 8.590  | 3.672  | -4.084 | -5.405  | -26.646 |
| Ie2_9      | -33.2   | 9.923  | 3.381  | -1.259 | -5.440  | -26.594 |
| Ie2_10     | -27.393 | 7.133  | 2.815  | -3.848 | -5.032  | -26.325 |
| Ie2_11     | -35.041 | 9.015  | 4.100  | -0.966 | -5.563  | -28.455 |
| Ie2_12     | -34.947 | 8.932  | 3.348  | -0.587 | -5.579  | -28.831 |
| Ie2_13     | -27.378 | 6.714  | 2.777  | -3.574 | -4.883  | -26.344 |
| Ie2_14     | -35.155 | 8.271  | 3.964  | -0.827 | -5.467  | -29.213 |
| Ie2_15     | -34.24  | 8.083  | 4.238  | -2.554 | -5.383  | -29.856 |
| Ie2_16     | -32.075 | 10.832 | 3.476  | -3.245 | -5.070  | -26.082 |
| Ie2_17     | -35.029 | 9.811  | 3.857  | -2     | -5.565  | -28.925 |
| Ie2_18     | -27.485 | 7.392  | 3.759  | -5.067 | -5.152  | -26.552 |
| Ie2_19     | -31.431 | 10.177 | 3.234  | -1.322 | -5.384  | -24.726 |
| Ie2_20     | -35.44  | 9.086  | 2.780  | 0.0718 | -5.774  | -29.276 |

**VDW:** van der Waals contribution (see Supporting Methods)

**ELEC\_R:** Electrostatic contribution (Receptor)

**ELEC\_L:** Electrostatic contribution (Ligand)

**COULOM:** Coulombic contribution

**APOLAR:** Apolar contribution
