# Supplementary material for: Protein-Protein Interaction Antagonists as Novel Inhibitors of Non-Canonical Polyubiquitylation
Source: PubMed Central journal article supplement (PMC2894972; doi:10.1371/journal.pone.0011403), 2010-06-30
Supplement: pone.0011403.s003.pdf [file pone.0011403.s003.pdf]

**Table S2.** Free binding energies for CDOCK selected enantiomers of family II cyclic compounds.

| Enantiomer | VDW     | ELEC_R | ELEC_L | COULOM  | APOLAR | TOTAL   |
|------------|---------|--------|--------|---------|--------|---------|
| Pe1_1      | -41.374 | 9.617  | 2.810  | -0.351  | -6.657 | -35.954 |
| Pe1_2      | -34.3   | 8.844  | 3.626  | -3.132  | -5.755 | -30.717 |
| Pe1_3      | -33.964 | 8.714  | 3.277  | -3.381  | -5.891 | -31.245 |
| Pe1_4      | -33.311 | 10.19  | 3.699  | -4.259  | -6.348 | -30.023 |
| Pe1_5      | -33.175 | 9.221  | 3.311  | -3.808  | -5.929 | -30.380 |
| Pe1_6      | -33.923 | 8.732  | 3.202  | -2.731  | -5.812 | -30.531 |
| Pe1_7      | -36.727 | 8.242  | 3.902  | -1.684  | -5.860 | -32.127 |
| Pe1_8      | -39.854 | 8.277  | 2.777  | -0.586  | -6.332 | -35.717 |
| Pe1_9      | -32.324 | 8.401  | 3.276  | -3.094  | -5.588 | -29.329 |
| Pe1_10     | -34.224 | 9.982  | 3.435  | -2.676  | -5.910 | -29.392 |
| Pe1_11     | -33.214 | 10.08  | 3.114  | -3.267  | -5.949 | -29.228 |
| Pe1_12     | -31.835 | 8.012  | 3.322  | -3.597  | -5.758 | -29.856 |
| Pe1_13     | -32.641 | 9.906  | 3.284  | -3.299  | -5.980 | -28.730 |
| Pe1_14     | -33.542 | 8.944  | 3.019  | -2.520  | -5.808 | -29.906 |
| Pe1_15     | -31.405 | 9.953  | 3.495  | -4.360  | -6.248 | -28.565 |
| Pe1_16     | -32.657 | 8.649  | 3.084  | -2.969  | -5.455 | -29.348 |
| Pe1_17     | -32.968 | 8.572  | 3.049  | -2.676  | -5.528 | -29.550 |
| Pe1_18     | -35.642 | 7.829  | 3.494  | -1.694  | -5.746 | -31.758 |
| Pe1_19     | -31.397 | 8.926  | 3.220  | -4.340  | -6.059 | -29.648 |
| Pe1_20     | -32.246 | 8.236  | 3.232  | -2.916  | -5.512 | -29.206 |
| Pe2_1      | -42.093 | 10.690 | 3.118  | 0.719   | -6.644 | -34.208 |
| Pe2_2      | -38.655 | 11.233 | 3.066  | -0.351  | -6.398 | -31.104 |
| Pe2_3      | -37.433 | 10.478 | 2.527  | 0.263   | -6.113 | -30.277 |
| Pe2_4      | -35.582 | 10.018 | 2.874  | -0.757  | -6.149 | -29.596 |
| Pe2_5      | -38.408 | 8.195  | 2.641  | 0.412   | -6.187 | -33.346 |
| Pe2_6      | -33.583 | 9.038  | 3.266  | -0.954  | -5.873 | -28.104 |
| Pe2_7      | -36.464 | 10.897 | 3.215  | -0.0821 | -6.452 | -28.885 |
| Pe2_8      | -36.416 | 11.038 | 2.956  | 0.206   | -6.386 | -28.600 |
| Pe2_9      | -33.992 | 10.437 | 2.975  | -0.740  | -5.797 | -27.116 |
| Pe2_10     | -36.924 | 11.121 | 3.023  | 0.242   | -6.399 | -28.935 |
| Pe2_11     | -29.899 | 7.811  | 2.760  | -2.630  | -5.072 | -27.029 |
| Pe2_12     | -38.441 | 8.702  | 2.758  | 0.485   | -6.343 | -32.838 |
| Pe2_13     | -33.03  | 9.463  | 3.036  | -1.231  | -5.740 | -27.502 |
| Pe2_14     | -37.198 | 10.561 | 2.954  | -0.903  | -5.968 | -30.554 |
| Pe2_15     | -32.242 | 10.384 | 2.693  | -2.062  | -5.464 | -26.690 |
| Pe2_16     | -35.59  | 9.764  | 2.287  | 0.0679  | -5.935 | -29.406 |
| Pe2_17     | -32.864 | 10.283 | 2.666  | -1.739  | -5.867 | -27.520 |
| Pe2_18     | -29.765 | 7.510  | 2.676  | -2.296  | -5.057 | -26.931 |
| Pe2_19     | -32.497 | 8.442  | 3.048  | -1.086  | -5.720 | -27.812 |
| Pe2_20     | -29.615 | 7.882  | 2.781  | -2.583  | -5.084 | -26.619 |

**VDW:** van der Waals contribution (see Supporting Methods)

**ELEC\_R:** Electrostatic contribution (Receptor)

**ELEC\_L:** Electrostatic contribution (Ligand)

**COULOM:** Coulombic contribution

**APOLAR:** Apolar contribution
